# Supplementary material
Source: PubMed Central journal article supplement (PMC2696152)

**Table S1:** Composition of fatty acid and control diets manufactured for continuous exposure studies by Research Diets Inc (New Brunswick, NJ). Data shown as g/1000g diet except where indicated.

| <b>Fatty Acid<br/>Gm/kg Diet</b> | <b>AIN</b> | <b>HFO</b> | <b>HFB</b> | <b>HFS</b> | <b>LFO</b> | <b>LFB</b> | <b>LFS</b> |
|----------------------------------|------------|------------|------------|------------|------------|------------|------------|
| <b>Palmitic</b>                  | 7.3        | 23.1       | 53.3       | 13.7       | 4.8        | 9.2        | 3.3        |
| <b>Oleic</b>                     | 17.0       | 134.4      | 53.7       | 26.4       | 23.2       | 11.0       | 6.9        |
| <b>Linoleic</b>                  | 37.5       | 33.3       | 14.3       | 154.8      | 11.5       | 8.8        | 29.8       |
| <b>Linolenic</b>                 | 5.5        | 2.4        | 4.2        | 1.6        | 1.3        | 1.6        | 1.2        |
| <b>Omega-3 FA</b>                | 5.5        | 2.4        | 4.2        | 1.6        | 1.3        | 1.6        | 1.2        |
| <b>Sat.</b>                      | 10         | 28.8       | 121.7      | 18.7       | 6.1        | 19.7       | 4.5        |
| <b>MUFA</b>                      | 17         | 136.9      | 61.1       | 26.4       | 23.6       | 12.1       | 6.9        |
| <b>PUFA</b>                      | 43         | 35.7       | 18.5       | 156.4      | 12.8       | 10.4       | 31         |
| <b>Total FA</b>                  | 70.0       | 201.5      | 201.5      | 201.5      | 42.4       | 42.4       | 42.4       |
| <b>tBHQ(mg/kg diet)</b>          | 1.4        | 4.10       | 4.10       | 4.10       | 0.86       | 0.86       | 0.86       |
| <b>n-6/n-3 (ratio)</b>           | 6.82       | 13.71      | 3.44       | 95.4       | 9.08       | 5.44       | 25.5       |
| <b>Protein (%)</b>               | 20.30      | 23.37      | 23.37      | 23.37      | 19.65      | 19.65      | 19.65      |
| <b>Carbohydrate (%)</b>          | 63.95      | 46.40      | 46.40      | 46.40      | 67.63      | 67.63      | 67.63      |
| <b>Fat (%) - Total</b>           | 7.00       | 20.15      | 20.15      | 20.15      | 4.24       | 4.24       | 4.24       |
| <b>% Total Fat</b>               |            |            |            |            |            |            |            |
| <b>Soybean Oil (%)</b>           | 100.00     | 8.57       | 8.57       | 8.57       | 34.25      | 34.25      | 34.25      |
| <b>Olive Oil (%)</b>             | 0.00       | 91.43      | 0.00       | 0.00       | 65.75      | 0.00       | 0.00       |
| <b>Safflower Oil (%)</b>         | 0.00       | 0.00       | 0.00       | 91.43      | 0.00       | 0.00       | 65.75      |
| <b>Butter,<br/>Anhydrous (%)</b> | 0.00       | 0.00       | 91.43      | 0.00       | 0.00       | 65.75      | 0.00       |
| <b>kcal/gm</b>                   | 4.00       | 4.60       | 4.60       | 4.60       | 3.87       | 3.87       | 3.87       |

**Figure S1:** Genes differentially expressed in fatty diets in comparison to the reference diet at 21 and 50 days. Heatmap depicts differences in average log<sub>2</sub> expression levels with red color representing up-regulation and green color down-regulation of gene expression for fatty acid diets. AIN-93G= reference diet, HFO=39% olive oil diet, HFB= 39% butter diet, HFS= 39% safflower oil diet, LFO=10% olive oil diet, LFB= 10% butter diet, LFS= 10% safflower oil diet.

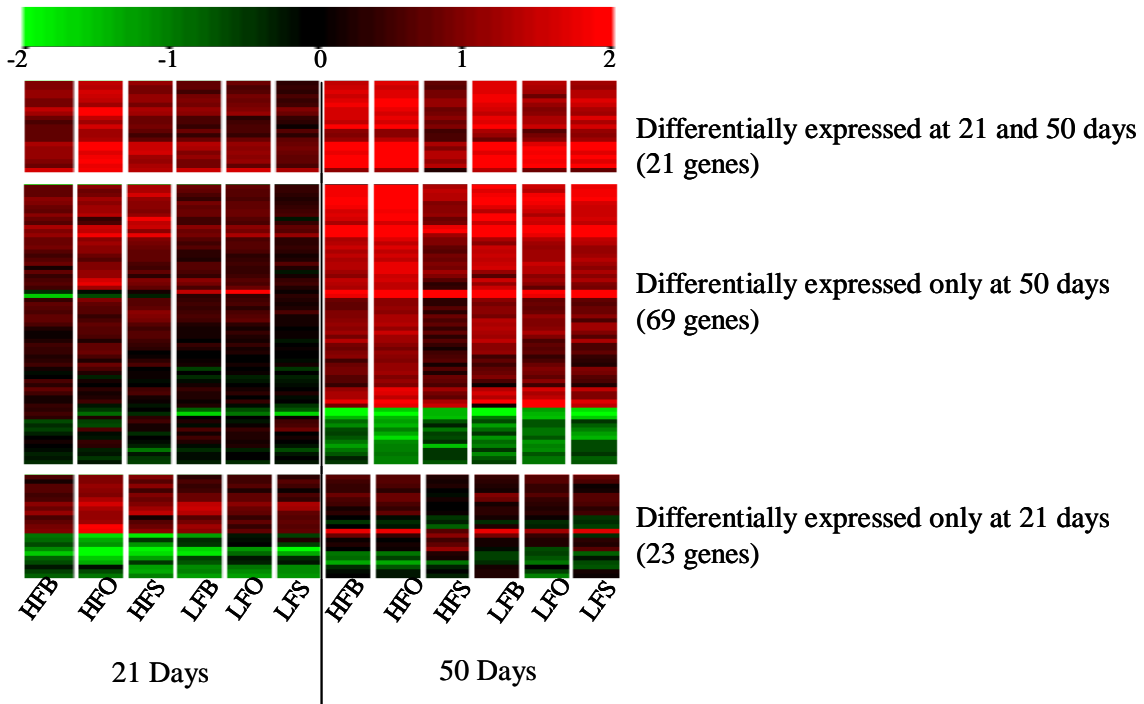

**Figure S2:** Cell cycle genes disregulated in fatty acid diets in comparison to the reference diet. Bar graphs represent the difference in average  $\log_2$  expression levels between individual fatty diets and the corresponding AIN-93G control group. Red bars represent differences statistically significant at our highest stringency level ( $fdr < 0.1$  and two-fold differential expression), green bars represent statistical significance at  $\alpha = 0.01$  level.

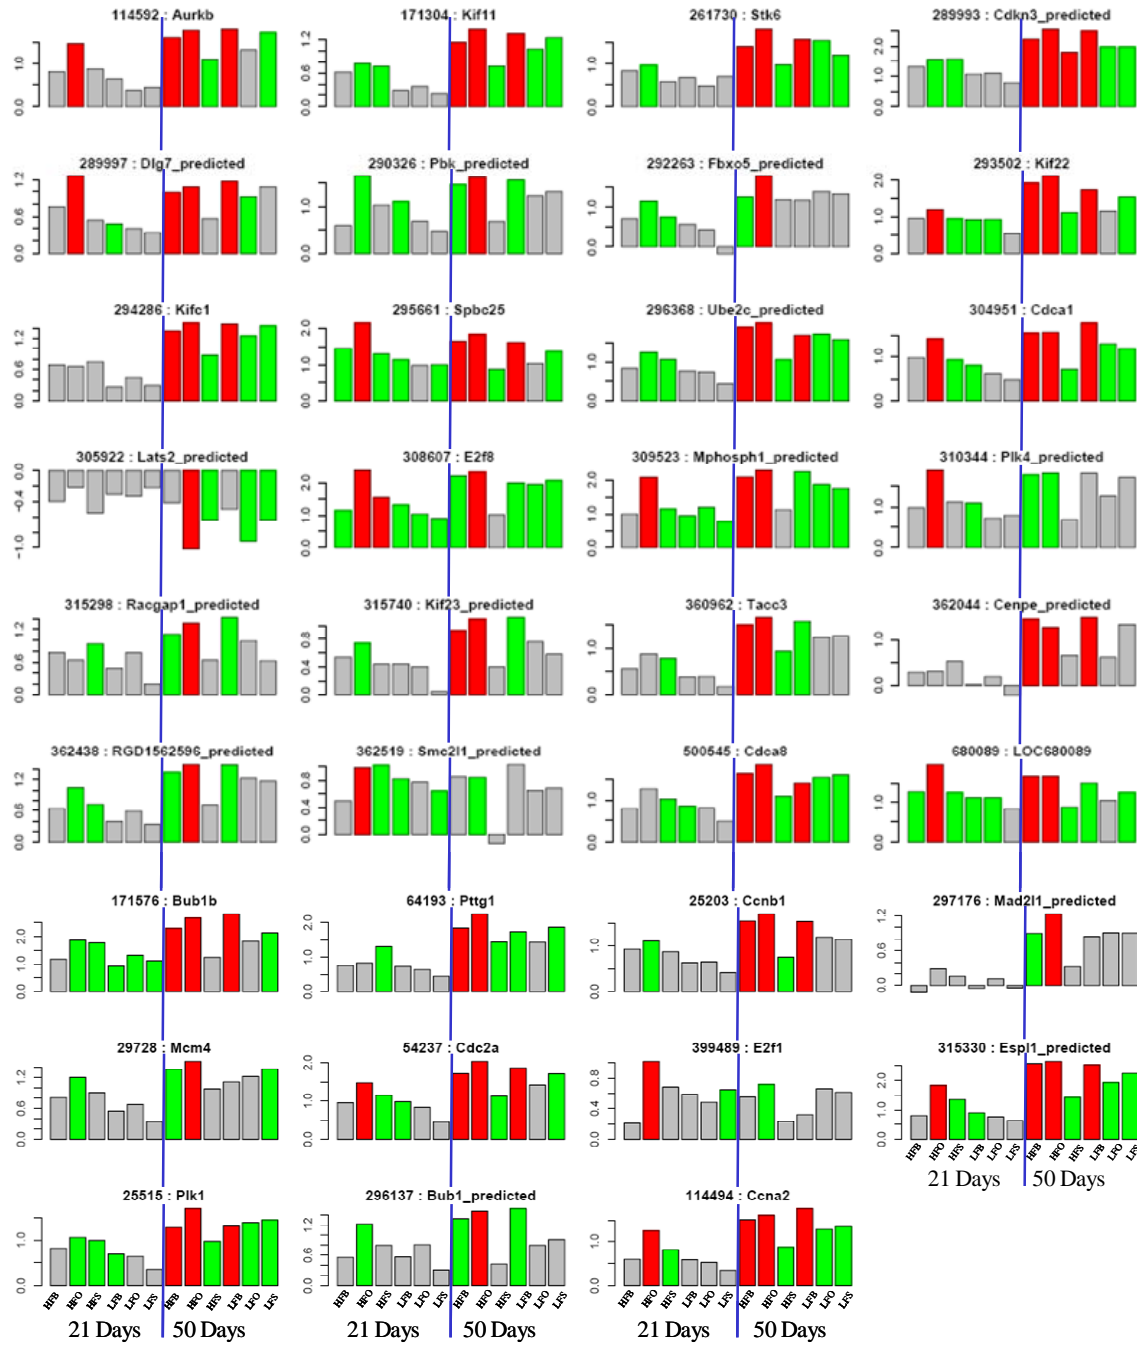

**Table S2:** Differences in average log2 expression levels between different fatty acid diets and corresponding reference AIN-93G diet for differentially expressed genes

| Genes Differentially Expressed at 21 and 50 days |                    | Day 21 |     |     |     |     |     | Day 50 |     |     |     |     |     |
|--------------------------------------------------|--------------------|--------|-----|-----|-----|-----|-----|--------|-----|-----|-----|-----|-----|
| Gene ID                                          | Symbol             | HFB    | HFO | HFS | LFB | LFO | LFS | HFB    | HFO | HFS | LFB | LFO | LFS |
| 114494                                           | Ccna2              | 0.6    | 1.3 | 0.8 | 0.6 | 0.5 | 0.3 | 1.5    | 1.6 | 0.9 | 1.8 | 1.3 | 1.4 |
| 114592                                           | Aurkb              | 0.8    | 1.5 | 0.9 | 0.6 | 0.4 | 0.4 | 1.6    | 1.8 | 1.1 | 1.8 | 1.3 | 1.7 |
| 25448                                            | Fshprh1            | 0.8    | 1.2 | 0.7 | 0.8 | 0.6 | 0.7 | 1.1    | 1.1 | 0.5 | 1.3 | 0.7 | 1.2 |
| 289997                                           | Dlg7_predicted     | 0.8    | 1.3 | 0.5 | 0.5 | 0.4 | 0.3 | 1.0    | 1.1 | 0.6 | 1.2 | 0.9 | 1.1 |
| 293502                                           | Kif22              | 1.0    | 1.2 | 0.9 | 0.9 | 0.9 | 0.5 | 1.9    | 2.1 | 1.1 | 1.7 | 1.2 | 1.5 |
| 295538                                           | Depdc1a_predicted  | 0.8    | 1.6 | 0.9 | 0.4 | 0.6 | 0.1 | 1.9    | 2.3 | 1.0 | 2.4 | 1.6 | 1.7 |
| 295661                                           | Spbc25             | 1.4    | 2.1 | 1.3 | 1.1 | 1.0 | 1.0 | 1.6    | 1.8 | 0.9 | 1.6 | 1.0 | 1.4 |
| 296060                                           | RGD1309107         | 1.1    | 1.6 | 0.9 | 0.5 | 0.7 | 0.4 | 1.7    | 1.7 | 0.9 | 1.8 | 1.2 | 1.4 |
| 303575                                           | RGD1310360         | 1.1    | 1.6 | 1.2 | 0.9 | 0.9 | 0.6 | 1.6    | 1.7 | 0.9 | 1.9 | 0.9 | 1.4 |
| 304951                                           | Cdca1              | 1.0    | 1.4 | 0.9 | 0.8 | 0.6 | 0.5 | 1.5    | 1.6 | 0.7 | 1.8 | 1.3 | 1.2 |
| 307805                                           | RGD1309383         | 1.2    | 1.7 | 1.6 | 1.0 | 1.2 | 0.8 | 1.8    | 2.1 | 1.4 | 1.7 | 1.9 | 1.7 |
| 308607                                           | E2f8               | 1.1    | 2.4 | 1.6 | 1.3 | 1.1 | 0.9 | 2.2    | 2.3 | 1.0 | 2.0 | 2.0 | 2.1 |
| 309523                                           | Mphosph1_predicted | 1.0    | 2.1 | 1.1 | 0.9 | 1.2 | 0.8 | 2.1    | 2.3 | 1.1 | 2.2 | 1.8 | 1.8 |
| 310621                                           | lqgap3_predicted   | 1.6    | 1.9 | 1.4 | 1.6 | 1.6 | 1.3 | 1.1    | 1.2 | 0.3 | 1.4 | 0.9 | 0.8 |
| 315330                                           | Esp1_predicted     | 0.8    | 1.8 | 1.3 | 0.9 | 0.8 | 0.6 | 2.6    | 2.6 | 1.4 | 2.5 | 1.9 | 2.2 |
| 360243                                           | Top2a              | 0.7    | 1.3 | 0.8 | 0.8 | 0.8 | 0.7 | 1.2    | 1.4 | 0.6 | 0.8 | 1.1 | 1.2 |
| 360847                                           | Ube2t_predicted    | 1.0    | 1.4 | 1.2 | 0.7 | 0.8 | 0.3 | 1.5    | 1.7 | 0.7 | 1.7 | 1.4 | 1.2 |
| 361921                                           | Ect2_predicted     | 1.3    | 2.3 | 1.5 | 1.4 | 1.2 | 0.9 | 2.2    | 2.4 | 1.3 | 2.3 | 1.7 | 2.0 |
| 362510                                           | Melk_predicted     | 1.1    | 1.9 | 1.2 | 1.1 | 1.1 | 0.7 | 2.5    | 2.4 | 1.4 | 2.2 | 2.1 | 2.1 |
| 54237                                            | Cdc2a              | 1.0    | 1.5 | 1.1 | 1.0 | 0.8 | 0.5 | 1.7    | 2.0 | 1.1 | 1.9 | 1.4 | 1.7 |
| 680089                                           | LOC680089          | 1.3    | 2.0 | 1.3 | 1.1 | 1.1 | 0.8 | 1.7    | 1.7 | 0.9 | 1.5 | 1.1 | 1.3 |

  

| Genes Differentially Expressed at 50, but not 21 days |                      | Day 21 |      |      |      |      |      | Day 50 |      |      |      |      |      |
|-------------------------------------------------------|----------------------|--------|------|------|------|------|------|--------|------|------|------|------|------|
| Gene ID                                               | Symbol               | HFB    | HFO  | HFS  | LFB  | LFO  | LFS  | HFB    | HFO  | HFS  | LFB  | LFO  | LFS  |
| 171162                                                | Reg3a                | 0.3    | -0.4 | 0.0  | -0.7 | -0.6 | -0.7 | -2.2   | -1.6 | -1.4 | -2.0 | -1.2 | -1.7 |
| 171304                                                | Kif11                | 0.6    | 0.8  | 0.7  | 0.3  | 0.4  | 0.2  | 1.1    | 1.4  | 0.7  | 1.3  | 1.0  | 1.2  |
| 171576                                                | Bub1b                | 1.2    | 1.9  | 1.8  | 0.9  | 1.3  | 1.1  | 2.3    | 2.7  | 1.2  | 2.8  | 1.8  | 2.1  |
| 192110                                                | Pou3f1               | -0.5   | 0.6  | 0.2  | 0.6  | 0.4  | 0.8  | -0.6   | -1.0 | -0.9 | -0.8 | -0.9 | -1.0 |
| 24268                                                 | Cp                   | -0.1   | -0.3 | -0.9 | -0.4 | -0.3 | -0.6 | -0.9   | -1.0 | -0.4 | -0.4 | -1.1 | -0.6 |
| 24373                                                 | Fst                  | -0.3   | -0.2 | -0.2 | -0.1 | 0.0  | -0.2 | -0.7   | -0.9 | -0.4 | -1.1 | -0.7 | -0.4 |
| 24584                                                 | Mylpf                | -0.4   | -0.1 | 0.2  | 1.5  | 2.1  | 0.1  | 3.2    | 4.2  | 6.3  | 2.7  | 4.8  | 4.7  |
| 24618                                                 | Pap                  | 0.5    | -0.9 | -0.3 | -1.6 | -0.9 | -1.7 | -3.7   | -2.5 | -1.4 | -2.7 | -1.4 | -2.8 |
| 246268                                                | Oas1b                | 0.0    | 0.3  | -0.3 | -0.1 | 0.3  | -0.2 | -1.2   | -1.0 | -1.5 | -1.0 | -1.0 | -0.6 |
| 25202                                                 | Gucy1b3              | -0.3   | -0.1 | -0.4 | 0.2  | 0.3  | 0.0  | -0.5   | -1.4 | -0.5 | -0.5 | -0.9 | -1.2 |
| 25203                                                 | Ccnb1                | 0.9    | 1.1  | 0.9  | 0.6  | 0.7  | 0.4  | 1.5    | 1.7  | 0.8  | 1.5  | 1.2  | 1.1  |
| 25261                                                 | Id1                  | 0.0    | -0.2 | -0.1 | 0.6  | 0.3  | 0.2  | -0.7   | -1.7 | -0.6 | -1.1 | -0.7 | -1.4 |
| 252915                                                | Mxd3                 | 0.7    | 0.6  | 1.5  | 0.5  | 0.6  | 0.4  | 1.3    | 1.7  | 0.9  | 1.6  | 1.5  | 1.5  |
| 25515                                                 | Plk1                 | 0.8    | 1.1  | 1.0  | 0.7  | 0.6  | 0.4  | 1.3    | 1.7  | 1.0  | 1.3  | 1.4  | 1.5  |
| 261730                                                | Stk6                 | 0.8    | 1.0  | 0.6  | 0.7  | 0.5  | 0.7  | 1.4    | 1.8  | 1.0  | 1.6  | 1.6  | 1.2  |
| 289054                                                | Aspm_predicted       | 1.0    | 1.5  | 1.1  | 0.9  | 0.9  | 0.7  | 2.8    | 2.9  | 1.9  | 2.8  | 2.2  | 2.5  |
| 289993                                                | Cdkn3_predicted      | 1.3    | 1.6  | 1.6  | 1.1  | 1.1  | 0.8  | 2.2    | 2.6  | 1.8  | 2.5  | 2.0  | 2.0  |
| 290326                                                | Pbk_predicted        | 0.6    | 1.7  | 1.0  | 1.1  | 0.7  | 0.5  | 1.5    | 1.6  | 0.7  | 1.6  | 1.2  | 1.3  |
| 291441                                                | RGD1310784_predicted | 1.1    | 1.2  | 1.2  | 0.5  | 0.6  | 0.3  | 2.6    | 2.7  | 1.4  | 2.7  | 2.0  | 2.1  |
| 292263                                                | Fbxo5_predicted      | 0.7    | 1.2  | 0.8  | 0.6  | 0.4  | -0.2 | 1.3    | 1.8  | 1.2  | 1.2  | 1.4  | 1.3  |
| 294286                                                | Kifc1                | 0.7    | 0.7  | 0.7  | 0.3  | 0.4  | 0.3  | 1.3    | 1.5  | 0.9  | 1.5  | 1.2  | 1.4  |
| 294712                                                | Solt_predicted       | 0.6    | 1.8  | 0.9  | 0.9  | 0.6  | 0.5  | 1.4    | 1.5  | 0.3  | 1.2  | 1.1  | 1.0  |
| 29504                                                 | Slc22a3              | -0.4   | -0.6 | 0.2  | -0.1 | 0.1  | 0.6  | -1.1   | -1.4 | -0.3 | -1.3 | -0.6 | -0.7 |
| 296137                                                | Bub1_predicted       | 0.6    | 1.2  | 0.8  | 0.6  | 0.8  | 0.3  | 1.3    | 1.5  | 0.4  | 1.5  | 0.8  | 0.9  |
| 296368                                                | Ube2c_predicted      | 0.8    | 1.2  | 1.1  | 0.8  | 0.7  | 0.4  | 1.9    | 2.0  | 1.0  | 1.7  | 1.7  | 1.6  |
| 297176                                                | Mad2l1_predicted     | -0.1   | 0.3  | 0.2  | -0.1 | 0.1  | 0.0  | 0.9    | 1.2  | 0.3  | 0.8  | 0.9  | 0.9  |
| 29728                                                 | Mcm4                 | 0.8    | 1.2  | 0.9  | 0.5  | 0.7  | 0.3  | 1.4    | 1.5  | 1.0  | 1.1  | 1.2  | 1.4  |
| 298559                                                | Tcea3                | 0.0    | -0.3 | 0.1  | -0.3 | -0.3 | -0.3 | 0.6    | 1.0  | 0.9  | 1.0  | 0.7  | 0.7  |
| 300219                                                | Troap_predicted      | 0.8    | 0.7  | 0.7  | 0.5  | 0.6  | 0.2  | 0.8    | 1.0  | 0.4  | 0.9  | 0.8  | 0.7  |
| 303175                                                | Hist3h2ba_predicted  | 0.7    | 0.3  | 0.5  | 0.5  | 0.2  | 0.1  | 1.2    | 1.8  | 1.2  | 1.4  | 1.6  | 1.5  |
| 304648                                                | Asf1b_predicted      | 0.8    | 1.1  | 1.3  | 0.9  | 0.7  | 0.5  | 1.9    | 2.2  | 1.3  | 1.9  | 1.5  | 1.8  |
| 305922                                                | Lats2_predicted      | -0.4   | -0.2 | -0.5 | -0.3 | -0.3 | -0.2 | -0.4   | -1.0 | -0.6 | -0.5 | -0.9 | -0.6 |
| 305984                                                | Cdca2                | 0.5    | 1.0  | 0.7  | 0.5  | 0.6  | 0.3  | 0.8    | 1.0  | 0.4  | 1.0  | 0.8  | 0.8  |
| 306464                                                | LOC306464            | 0.2    | 0.3  | 0.2  | 0.3  | 0.0  | -0.1 | 1.3    | 1.5  | 0.8  | 1.4  | 1.5  | 1.0  |

**Continued Genes Differentially Expressed at 50, but not 21 day**

| Gene ID | Symbol               | Day 21 |      |      |      |      |      | Day 50 |      |      |      |      |      |
|---------|----------------------|--------|------|------|------|------|------|--------|------|------|------|------|------|
|         |                      | HFB    | HFO  | HFS  | LFB  | LFO  | LFS  | HFB    | HFO  | HFS  | LFB  | LFO  | LFS  |
| 311569  | Acss2_predicted      | -0.6   | -0.5 | 0.5  | 0.3  | -0.2 | 0.5  | -0.9   | -1.3 | -0.7 | -0.6 | -0.7 | -0.4 |
| 311598  | RGD1565583_predicted | 0.5    | 0.8  | 0.4  | 0.3  | 0.2  | 0.1  | 0.8    | 0.9  | 0.2  | 1.1  | 0.6  | 0.6  |
| 314675  | Btbd11_predicted     | 0.2    | 0.4  | -0.2 | 0.3  | 0.2  | 0.1  | -0.9   | -1.0 | -0.3 | -0.8 | -1.1 | -0.6 |
| 315298  | Racgap1_predicted    | 0.8    | 0.6  | 0.9  | 0.5  | 0.8  | 0.2  | 1.1    | 1.3  | 0.6  | 1.4  | 1.0  | 0.6  |
| 315740  | Kif23_predicted      | 0.5    | 0.7  | 0.4  | 0.4  | 0.4  | 0.1  | 0.9    | 1.1  | 0.4  | 1.1  | 0.8  | 0.6  |
| 360962  | Tacc3                | 0.6    | 0.9  | 0.8  | 0.4  | 0.4  | 0.2  | 1.5    | 1.6  | 0.9  | 1.6  | 1.2  | 1.3  |
| 361047  | RGD1307201_predicted | 0.2    | 0.7  | 0.6  | 0.2  | 0.2  | 0.1  | 1.1    | 1.2  | 0.4  | 1.4  | 1.1  | 1.2  |
| 361308  | Kif20a_predicted     | 1.1    | 1.4  | 1.1  | 0.8  | 0.8  | 0.6  | 1.7    | 2.0  | 1.2  | 2.2  | 1.3  | 1.5  |
| 361416  | RGD1310953           | 0.1    | 0.7  | 0.6  | 0.2  | 0.4  | 0.1  | 1.2    | 1.5  | 0.8  | 1.3  | 1.3  | 1.0  |
| 361705  | Cnih2                | 0.5    | 0.8  | 0.6  | 0.2  | 0.2  | 0.2  | 0.8    | 1.2  | 0.2  | 0.5  | 0.8  | 0.2  |
| 362044  | Cenpe_predicted      | 0.3    | 0.3  | 0.5  | 0.0  | 0.2  | -0.2 | 1.4    | 1.3  | 0.7  | 1.5  | 0.6  | 1.3  |
| 362438  | RGD1562596_predicted | 0.6    | 1.0  | 0.7  | 0.4  | 0.6  | 0.3  | 1.3    | 1.5  | 0.7  | 1.5  | 1.2  | 1.2  |
| 363028  | Spbc24_predicted     | 0.8    | 0.9  | 1.6  | 0.6  | 0.7  | 0.4  | 1.9    | 2.1  | 1.4  | 1.9  | 1.9  | 1.9  |
| 363093  | Mns1                 | 0.2    | 0.5  | 0.1  | 0.1  | 0.4  | 0.0  | 1.8    | 2.4  | 1.4  | 2.0  | 2.0  | 1.7  |
| 363460  | Fgd1                 | 0.3    | 0.0  | -0.1 | 0.2  | -0.1 | -0.1 | 0.4    | 1.0  | 0.6  | 0.1  | 0.5  | 0.3  |
| 363632  | Sox15_predicted      | 0.4    | 0.3  | 0.3  | 0.1  | -0.1 | -0.1 | 0.5    | 1.0  | 0.7  | 0.7  | 0.6  | 0.3  |
| 364240  | Dnajc9_predicted     | 0.5    | 1.1  | 0.4  | 0.5  | 0.5  | 0.2  | 1.1    | 1.6  | 1.0  | 0.7  | 1.1  | 1.1  |
| 378947  | Bst2                 | 0.4    | -0.2 | -0.2 | 0.3  | -0.1 | -0.4 | 0.9    | 1.8  | 1.5  | 0.2  | 2.1  | 1.5  |
| 499204  | RGD1559690_predicted | 0.2    | 0.6  | 0.7  | 0.2  | 0.3  | 0.2  | 0.9    | 1.2  | 0.4  | 1.2  | 1.0  | 0.7  |
| 500545  | Cdca8                | 0.8    | 1.3  | 1.0  | 0.8  | 0.8  | 0.5  | 1.6    | 1.8  | 1.1  | 1.4  | 1.5  | 1.6  |
| 501097  | RGD1560271_predicted | 0.6    | 0.2  | -0.1 | -0.1 | -0.2 | -0.2 | 0.7    | 1.2  | 0.7  | 0.6  | 1.1  | 0.6  |
| 50559   | Cte1                 | 0.5    | 0.9  | 0.0  | 0.0  | 0.3  | 0.1  | 1.0    | 1.1  | 0.6  | 1.1  | 0.8  | 0.8  |
| 58921   | Foxm1                | 0.6    | 0.7  | 1.1  | 0.5  | 0.6  | 0.6  | 1.0    | 1.1  | 0.4  | 1.1  | 0.8  | 0.8  |
| 58958   | Pom210               | 0.2    | 0.6  | 0.1  | -0.5 | 0.0  | -0.4 | 0.9    | 1.1  | 0.7  | 0.7  | 1.0  | 1.0  |
| 64124   | Eltd1                | -0.2   | -0.5 | -0.4 | -0.1 | 0.1  | -0.1 | -0.3   | -1.0 | -0.4 | -0.7 | -0.9 | -0.7 |
| 64193   | Pttg1                | 0.8    | 0.8  | 1.3  | 0.7  | 0.6  | 0.4  | 1.9    | 2.3  | 1.4  | 1.7  | 1.4  | 1.9  |
| 654441  | Cox6b2               | 0.5    | 0.2  | 0.6  | 0.3  | 0.4  | 0.3  | 1.3    | 1.7  | 0.9  | 1.7  | 1.3  | 1.0  |
| 680047  | LOC680047            | 0.4    | 0.3  | 0.4  | 0.0  | 0.0  | 0.1  | -1.4   | -1.4 | -1.5 | -0.9 | -1.5 | -1.5 |
| 680312  | LOC680312            | 0.9    | 0.4  | 1.9  | 0.5  | 0.7  | -0.2 | 1.7    | 2.1  | 0.9  | 2.3  | 1.6  | 1.7  |
| 680531  | LOC680531            | 0.7    | 0.4  | 1.0  | 0.6  | 0.7  | 0.2  | 1.0    | 1.4  | 0.8  | 0.9  | 1.2  | 1.1  |
| 685462  | LOC685462            | 0.3    | 0.6  | 0.1  | 0.0  | 0.1  | -0.1 | 1.1    | 1.1  | 0.6  | 0.5  | 0.5  | 0.4  |
| 689399  | LOC689399            | 1.0    | 1.1  | 1.1  | 0.9  | 0.8  | 0.4  | 2.0    | 2.2  | 1.0  | 2.0  | 1.9  | 1.7  |

**Genes Differentially Expressed at 21, but not 50 days**

| Gene ID | Symbol           | Day 21 |      |      |      |      |      | Day 50 |      |      |      |      |      |
|---------|------------------|--------|------|------|------|------|------|--------|------|------|------|------|------|
|         |                  | HFB    | HFO  | HFS  | LFB  | LFO  | LFS  | HFB    | HFO  | HFS  | LFB  | LFO  | LFS  |
| 114122  | Cspg2            | 0.6    | 1.3  | 0.8  | 0.8  | 0.7  | 0.4  | 0.6    | 0.8  | 0.2  | 0.8  | 0.4  | 0.7  |
| 24450   | Hmgcs2           | -0.9   | -1.7 | -1.8 | -1.2 | -0.2 | -0.6 | 0.8    | 0.4  | 1.1  | 1.0  | 0.4  | -0.3 |
| 25117   | Hsd11b2          | 0.7    | 1.1  | 1.1  | 0.5  | 0.7  | 0.5  | 0.4    | 0.6  | 0.3  | 0.3  | 0.4  | 0.2  |
| 25675   | Hmgcr            | 0.6    | 1.1  | 0.2  | 0.7  | 0.4  | 0.7  | 0.1    | -0.1 | -0.4 | 0.2  | 0.1  | -0.4 |
| 25719   | Sgne1            | -0.2   | -0.1 | -1.3 | -1.0 | -0.9 | -1.1 | -0.3   | -0.7 | -0.3 | 0.2  | -0.1 | -0.7 |
| 287678  | Krt1-23          | -0.5   | -0.6 | -1.3 | -1.0 | -1.1 | -1.1 | -0.1   | -0.2 | 0.0  | 0.3  | -0.5 | 0.2  |
| 287910  | Ccl6             | -0.6   | -1.2 | -1.2 | -0.4 | 0.0  | -0.5 | 0.3    | 0.2  | 0.8  | 0.2  | 0.3  | 0.3  |
| 29168   | Ubd              | -1.1   | -2.1 | -1.9 | -1.7 | -1.2 | -2.0 | -0.1   | 0.1  | 1.2  | -0.1 | -0.6 | 0.7  |
| 29230   | Sqle             | 0.9    | 2.0  | 0.9  | 1.2  | 0.5  | 0.7  | 0.0    | -0.2 | -0.7 | 0.3  | -0.3 | -0.6 |
| 295703  | Serping1         | -0.7   | -1.6 | -1.2 | -0.5 | -0.2 | -0.4 | -0.8   | -0.5 | 0.2  | -0.5 | -0.7 | -0.2 |
| 303330  | Tmem97           | 0.8    | 1.3  | 1.3  | 1.5  | 0.9  | 1.3  | 0.2    | 0.4  | -0.1 | 0.4  | 0.3  | 0.3  |
| 305341  | Rhoh             | -1.6   | -2.0 | -1.7 | -1.8 | -0.8 | -1.3 | -0.9   | -0.9 | 0.3  | -0.5 | -0.5 | -0.7 |
| 306748  | Cxcl14           | -0.6   | -1.3 | -0.5 | -0.7 | -0.3 | -0.2 | -1.3   | -1.3 | -1.0 | -0.4 | -0.9 | -0.6 |
| 310344  | Plk4_predicted   | 1.0    | 1.9  | 1.1  | 1.1  | 0.7  | 0.8  | 1.8    | 1.8  | 0.7  | 1.8  | 1.3  | 1.7  |
| 360887  | Cabc1            | -0.8   | -1.3 | -0.4 | -0.4 | -0.2 | 0.3  | 0.1    | 0.1  | 0.5  | 0.2  | 0.3  | 0.3  |
| 362519  | Smc2l1_predicted | 0.5    | 1.0  | 1.0  | 0.8  | 0.8  | 0.6  | 0.8    | 0.8  | -0.1 | 1.0  | 0.6  | 0.7  |
| 362605  | Tmem54           | 1.2    | 1.2  | 1.5  | 1.4  | 0.8  | 0.7  | 0.4    | 0.7  | 0.2  | 0.3  | 0.4  | 0.5  |
| 399489  | E2f1             | 0.2    | 1.0  | 0.7  | 0.6  | 0.5  | 0.7  | 0.6    | 0.7  | 0.2  | 0.3  | 0.7  | 0.6  |
| 499933  | LOC499933        | 0.7    | 1.1  | 0.6  | 0.5  | 0.3  | 0.1  | 0.4    | 0.4  | 0.1  | 0.2  | 0.4  | 0.2  |
| 500972  | Stt3a_predicted  | 0.8    | 1.2  | 0.7  | 0.9  | 0.8  | 0.8  | -0.4   | -0.4 | -0.3 | -0.3 | -0.3 | -0.4 |
| 64157   | Ddah1            | 1.1    | 1.6  | 1.0  | 1.5  | 1.1  | 1.3  | 0.5    | 0.6  | -0.1 | 0.2  | 0.3  | 0.6  |
| 65053   | Pamci            | -0.8   | -0.9 | -1.0 | -1.3 | -1.2 | -1.2 | -0.1   | -0.2 | -0.3 | 0.3  | -1.0 | 0.1  |
| 84490   | Fen1             | 0.6    | 1.0  | 1.0  | 0.4  | 0.5  | 0.4  | 0.7    | 0.7  | 0.3  | 0.5  | 0.6  | 0.8  |

**Figure S3:** Cluster analysis of 1,109 genes implicated by the less stringent criteria for statistical significance ( $p$ -value $<0.01$  and 1.5 fold differential expression) of differences between fatty acids diets and reference diet. The heatmap displays the hierarchical clustering of all 1,109 genes and the statistical significance of the most enriched GO categories. Three relevant clusters of co-expressed and functionally related genes identified by cluster analysis are denoted by vertical bars on the right hand side.

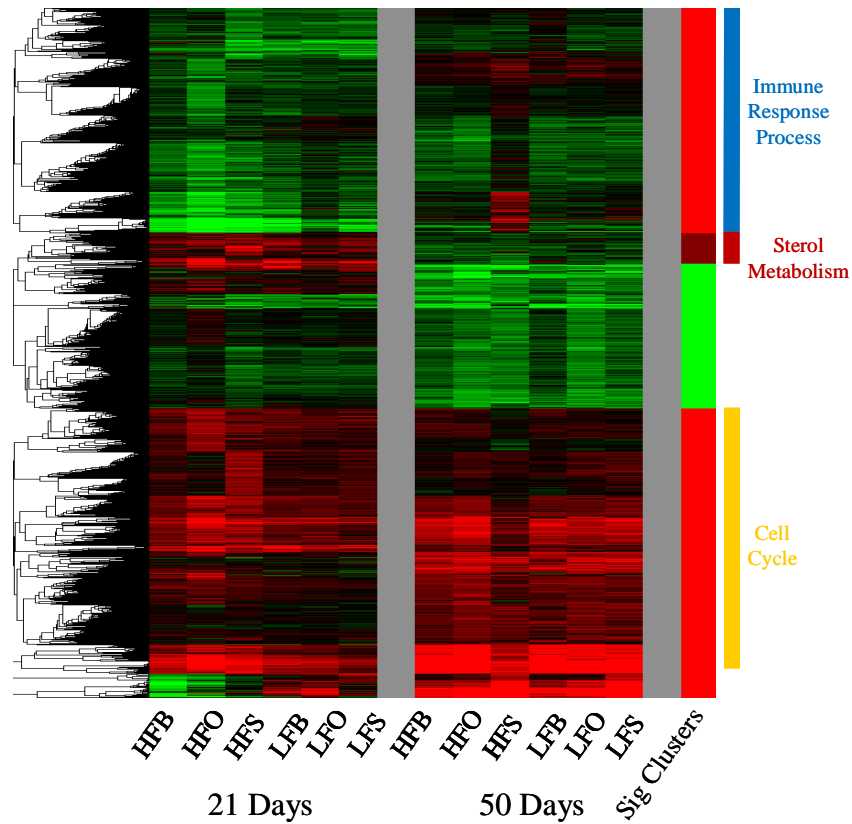

**Table S3:** Differences in average log2 expression levels between different fatty acid diets and corresponding reference AIN diet for cell cycle genes in the “cell cycle” cluster

| Gene ID | Symbol               | Day 21 |      |      |      |      |      | Day 50 |      |      |      |      |     |
|---------|----------------------|--------|------|------|------|------|------|--------|------|------|------|------|-----|
|         |                      | HFB    | HFO  | HFS  | LFB  | LFO  | LFS  | HFB    | HFO  | HFS  | LFB  | LFO  | LFS |
| 24924   | Ptn                  | 0.4    | 0.7  | 0.3  | 0.8  | 0.4  | 0.3  | 0.7    | 0.9  | 0.4  | 1.0  | 0.6  | 0.7 |
| 25203   | Ccnb1                | 0.9    | 1.1  | 0.9  | 0.6  | 0.7  | 0.4  | 1.5    | 1.7  | 0.8  | 1.5  | 1.2  | 1.1 |
| 25515   | Plk1                 | 0.8    | 1.1  | 1.0  | 0.7  | 0.6  | 0.4  | 1.3    | 1.7  | 1.0  | 1.3  | 1.4  | 1.5 |
| 25729   | Ccne1                | 0.7    | 1.4  | 1.5  | 0.9  | 0.7  | 0.9  | 0.8    | 1.0  | 0.3  | 0.5  | 0.7  | 0.7 |
| 25737   | Pcna                 | 0.4    | 1.0  | 0.6  | 0.5  | 0.4  | 0.3  | 0.6    | 0.7  | 0.1  | 0.6  | 0.4  | 0.7 |
| 54237   | Cdc2a                | 1.0    | 1.5  | 1.1  | 1.0  | 0.8  | 0.5  | 1.7    | 2.0  | 1.1  | 1.9  | 1.4  | 1.7 |
| 64012   | Rad50                | -0.1   | 0.1  | 0.0  | 0.1  | 0.2  | -0.1 | 0.6    | 0.6  | 0.5  | 0.4  | 0.6  | 0.5 |
| 64193   | Pttg1                | 0.8    | 0.8  | 1.3  | 0.7  | 0.6  | 0.4  | 1.9    | 2.3  | 1.4  | 1.7  | 1.4  | 1.9 |
| 64515   | Cdc20                | 0.4    | 0.6  | 1.1  | 0.7  | 0.7  | 0.5  | 0.9    | 1.5  | 0.4  | 1.1  | 0.8  | 1.6 |
| 64557   | Bard1                | 0.3    | 0.2  | 0.6  | 0.1  | 0.0  | 0.1  | 0.4    | 0.7  | 0.3  | 0.4  | 0.4  | 0.4 |
| 64576   | Ptprv                | 0.5    | 0.6  | 0.6  | 0.3  | 0.3  | 0.0  | 0.3    | 0.4  | 0.2  | 0.2  | 0.3  | 0.2 |
| 64709   | Nucks                | 0.1    | 0.7  | 0.3  | 0.4  | 0.3  | 0.1  | 0.6    | 0.7  | 0.4  | 0.5  | 0.6  | 0.5 |
| 65179   | Ppp5c                | -0.4   | -0.3 | -0.1 | -0.1 | 0.1  | 0.4  | 0.5    | 1.1  | 1.0  | 0.4  | 0.9  | 0.9 |
| 79433   | Myh10                | 0.5    | 0.9  | 0.3  | 0.6  | 0.7  | 0.4  | 0.7    | 0.8  | 0.4  | 0.7  | 0.7  | 0.6 |
| 85241   | Pola1                | 0.8    | 1.5  | 1.0  | 0.7  | 0.8  | 0.5  | 1.1    | 1.3  | 0.7  | 0.9  | 0.9  | 1.2 |
| 114494  | Ccna2                | 0.6    | 1.3  | 0.8  | 0.6  | 0.5  | 0.3  | 1.5    | 1.6  | 0.9  | 1.8  | 1.3  | 1.4 |
| 114592  | Aurkb                | 0.8    | 1.5  | 0.9  | 0.6  | 0.4  | 0.4  | 1.6    | 1.8  | 1.1  | 1.8  | 1.3  | 1.7 |
| 116490  | Snai1                | 0.2    | 0.3  | 0.4  | 0.5  | 0.6  | 0.5  | -0.1   | 0.2  | 0.1  | -0.2 | 0.3  | 0.0 |
| 117524  | Ccnf                 | 0.3    | 0.6  | 0.1  | 0.3  | 0.3  | 0.1  | 0.8    | 0.7  | 0.4  | 0.5  | 0.6  | 0.4 |
| 140583  | Chek1                | 0.6    | 0.9  | 0.7  | 0.7  | 0.6  | 0.5  | 0.5    | 0.6  | -0.1 | 0.2  | 0.4  | 0.1 |
| 171304  | Kif11                | 0.6    | 0.8  | 0.7  | 0.3  | 0.4  | 0.2  | 1.1    | 1.4  | 0.7  | 1.3  | 1.0  | 1.2 |
| 246060  | Cdkn1c               | 0.2    | 0.3  | 0.1  | 0.1  | -0.1 | 0.0  | 1.2    | 1.2  | 1.1  | 1.2  | 1.0  | 0.9 |
| 252921  | Tubg1                | 0.2    | -0.2 | 0.6  | 0.2  | 0.0  | 0.2  | 0.4    | 0.6  | 0.2  | 0.5  | 0.5  | 0.5 |
| 259229  | Ppm1g                | 0.1    | -0.1 | 0.0  | 0.1  | 0.1  | 0.0  | 0.5    | 0.6  | 0.5  | 0.1  | 0.4  | 0.7 |
| 261730  | Stk6                 | 0.8    | 1.0  | 0.6  | 0.7  | 0.5  | 0.7  | 1.4    | 1.8  | 1.0  | 1.6  | 1.6  | 1.2 |
| 288778  | Pa2g4                | 0.5    | 0.7  | 0.4  | 0.2  | 0.6  | 0.1  | 0.0    | 0.5  | 0.1  | 0.0  | 0.4  | 0.3 |
| 289993  | Cdkn3_predicted      | 1.3    | 1.6  | 1.6  | 1.1  | 1.1  | 0.8  | 2.2    | 2.6  | 1.8  | 2.5  | 2.0  | 2.0 |
| 289997  | Dlg7_predicted       | 0.8    | 1.3  | 0.5  | 0.5  | 0.4  | 0.3  | 1.0    | 1.1  | 0.6  | 1.2  | 0.9  | 1.1 |
| 290326  | Pbk_predicted        | 0.6    | 1.7  | 1.0  | 1.1  | 0.7  | 0.5  | 1.5    | 1.6  | 0.7  | 1.6  | 1.2  | 1.3 |
| 292071  | Ris2_predicted       | 0.5    | 1.5  | 1.2  | 0.7  | 0.7  | 0.8  | 0.8    | 1.0  | 0.2  | 0.7  | 0.7  | 1.2 |
| 292263  | Fbxo5_predicted      | 0.7    | 1.2  | 0.8  | 0.6  | 0.4  | -0.2 | 1.3    | 1.8  | 1.2  | 1.2  | 1.4  | 1.3 |
| 293502  | Kif22                | 1.0    | 1.2  | 0.9  | 0.9  | 0.9  | 0.5  | 1.9    | 2.1  | 1.1  | 1.7  | 1.2  | 1.5 |
| 294286  | Kifc1                | 0.7    | 0.7  | 0.7  | 0.3  | 0.4  | 0.3  | 1.3    | 1.5  | 0.9  | 1.5  | 1.2  | 1.4 |
| 295661  | Spbc25               | 1.4    | 2.1  | 1.3  | 1.1  | 1.0  | 1.0  | 1.6    | 1.8  | 0.9  | 1.6  | 1.0  | 1.4 |
| 296137  | Bub1_predicted       | 0.6    | 1.2  | 0.8  | 0.6  | 0.8  | 0.3  | 1.3    | 1.5  | 0.4  | 1.5  | 0.8  | 0.9 |
| 296344  | Mybl2_predicted      | 0.6    | 1.2  | 0.8  | 0.5  | 0.4  | 0.3  | 0.8    | 0.8  | 0.2  | 0.6  | 0.5  | 0.5 |
| 296368  | Ube2c_predicted      | 0.8    | 1.2  | 1.1  | 0.8  | 0.7  | 0.4  | 1.9    | 2.0  | 1.0  | 1.7  | 1.7  | 1.6 |
| 297176  | Mad2l1_predicted     | -0.1   | 0.3  | 0.2  | -0.1 | 0.1  | 0.0  | 0.9    | 1.2  | 0.3  | 0.8  | 0.9  | 0.9 |
| 298441  | Nasp                 | 0.4    | 0.7  | 0.6  | 0.4  | 0.4  | 0.1  | 0.2    | 0.3  | -0.1 | 0.4  | 0.2  | 0.5 |
| 301701  | Kntc2_predicted      | 0.5    | 0.6  | 0.7  | 0.4  | 0.5  | 0.3  | 0.6    | 0.7  | 0.2  | 0.8  | 0.4  | 0.6 |
| 304477  | Kntc1_predicted      | 0.1    | 0.4  | 0.6  | -0.1 | 0.3  | 0.2  | 0.7    | 0.6  | 0.2  | 0.7  | 0.8  | 0.5 |
| 304951  | Cdca1                | 1.0    | 1.4  | 0.9  | 0.8  | 0.6  | 0.5  | 1.5    | 1.6  | 0.7  | 1.8  | 1.3  | 1.2 |
| 308607  | E2f8                 | 1.1    | 2.4  | 1.6  | 1.3  | 1.1  | 0.9  | 2.2    | 2.3  | 1.0  | 2.0  | 2.0  | 2.1 |
| 308870  | Numa1                | 0.2    | -0.1 | 0.0  | 0.0  | 0.2  | 0.0  | 0.2    | 0.5  | 0.5  | 0.1  | 0.6  | 0.7 |
| 308937  | Wee1                 | 0.0    | 0.7  | 0.1  | 0.3  | 0.2  | 0.5  | 0.2    | -0.1 | 0.0  | 0.1  | 0.4  | 0.1 |
| 309523  | Mphosph1_predicted   | 1.0    | 2.1  | 1.1  | 0.9  | 1.2  | 0.8  | 2.1    | 2.3  | 1.1  | 2.2  | 1.8  | 1.8 |
| 310344  | Plk4_predicted       | 1.0    | 1.9  | 1.1  | 1.1  | 0.7  | 0.8  | 1.8    | 1.8  | 0.7  | 1.8  | 1.3  | 1.7 |
| 315298  | Racgap1_predicted    | 0.8    | 0.6  | 0.9  | 0.5  | 0.8  | 0.2  | 1.1    | 1.3  | 0.6  | 1.4  | 1.0  | 0.6 |
| 315330  | Espl1_predicted      | 0.8    | 1.8  | 1.3  | 0.9  | 0.8  | 0.6  | 2.6    | 2.6  | 1.4  | 2.5  | 1.9  | 2.2 |
| 315740  | Kif23_predicted      | 0.5    | 0.7  | 0.4  | 0.4  | 0.4  | 0.1  | 0.9    | 1.1  | 0.4  | 1.1  | 0.8  | 0.6 |
| 315852  | Ttk_predicted        | 0.9    | 1.3  | 0.8  | 0.7  | 0.5  | 0.4  | 0.9    | 1.1  | 0.3  | 0.7  | 0.7  | 0.7 |
| 360643  | Cdc27                | 0.5    | 0.6  | 0.5  | 0.4  | 0.1  | 0.2  | 0.3    | 0.2  | -0.2 | 0.5  | 0.2  | 0.1 |
| 360804  | Cdk2ap1_predicted    | 0.5    | 0.7  | 0.4  | 0.3  | 0.3  | 0.3  | 0.1    | 0.1  | -0.2 | 0.1  | -0.1 | 0.1 |
| 360962  | Tacc3                | 0.6    | 0.9  | 0.8  | 0.4  | 0.4  | 0.2  | 1.5    | 1.6  | 0.9  | 1.6  | 1.2  | 1.3 |
| 361435  | Fanca_predicted      | 0.6    | 0.7  | 0.9  | 0.4  | 0.5  | 0.3  | 0.4    | 0.4  | 0.3  | 0.2  | 0.3  | 0.2 |
| 362044  | Cenpe_predicted      | 0.3    | 0.3  | 0.5  | 0.0  | 0.2  | -0.2 | 1.4    | 1.3  | 0.7  | 1.5  | 0.6  | 1.3 |
| 362342  | Hipk2_predicted      | 0.2    | 0.0  | 0.6  | 0.2  | 0.3  | 0.5  | 0.2    | 0.3  | 0.2  | -0.3 | 0.2  | 0.4 |
| 362438  | RGD1562596_predicted | 0.6    | 1.0  | 0.7  | 0.4  | 0.6  | 0.3  | 1.3    | 1.5  | 0.7  | 1.5  | 1.2  | 1.2 |
| 362485  | Ccne2_predicted      | 0.2    | 0.9  | 0.8  | 0.4  | 0.6  | 0.2  | 0.2    | 0.3  | -0.2 | 0.3  | 0.2  | 0.2 |
| 362519  | Smc2l1_predicted     | 0.5    | 1.0  | 1.0  | 0.8  | 0.8  | 0.6  | 0.8    | 0.8  | -0.1 | 1.0  | 0.6  | 0.7 |
| 365388  | Psm13_predicted      | 0.1    | 0.0  | 0.3  | 0.1  | 0.0  | 0.0  | 0.4    | 0.6  | 0.4  | 0.5  | 0.9  | 0.7 |
| 399489  | E2f1                 | 0.2    | 1.0  | 0.7  | 0.6  | 0.5  | 0.7  | 0.6    | 0.7  | 0.2  | 0.3  | 0.7  | 0.6 |

**Table S4:** Differences in average log2 expression levels between different fatty acid diets and corresponding reference AIN diet for immunity-related genes in the “immune” cluster.

| Gene ID | Symbol          | Day 21 |      |      |      |      |      | Day 50 |      |      |      |      |      |
|---------|-----------------|--------|------|------|------|------|------|--------|------|------|------|------|------|
|         |                 | HFB    | HFO  | HFS  | LFB  | LFO  | LFS  | HFB    | HFO  | HFS  | LFB  | LFO  | LFS  |
| 24499   | Il6ra           | -0.7   | -1.1 | -0.5 | 0.0  | 0.2  | -0.1 | -0.5   | -0.5 | -0.4 | -0.7 | -0.3 | -0.3 |
| 24575   | Mx1             | -1.1   | -1.0 | -1.0 | -0.9 | 0.5  | -1.0 | -0.3   | 0.0  | 0.7  | -0.1 | -0.3 | 0.7  |
| 24699   | Ptprc           | -0.4   | -0.5 | -0.6 | -0.6 | 0.0  | -0.4 | 0.0    | -0.2 | 0.4  | -0.2 | -0.3 | 0.0  |
| 24747   | RT1-M3          | -0.3   | -0.1 | -0.7 | -0.5 | -0.1 | -0.6 | 0.1    | 0.3  | 0.1  | 0.3  | 0.1  | 0.2  |
| 24796   | Spn             | -1.3   | -1.6 | -1.1 | -1.2 | -0.6 | -1.2 | -0.1   | -0.2 | 0.2  | -0.6 | -0.3 | -0.4 |
| 24930   | Cd8a            | -0.9   | -1.3 | -0.9 | -0.8 | -0.4 | -0.7 | -0.3   | -0.4 | 0.5  | -0.4 | -0.3 | -0.3 |
| 25047   | Fcer1a          | -1.2   | -0.6 | -1.3 | -1.2 | -0.8 | -0.7 | -0.5   | -0.6 | -0.2 | 0.2  | -0.8 | -0.5 |
| 25296   | Bmp4            | 0.0    | -0.4 | -0.4 | 0.3  | 0.5  | 0.4  | -0.8   | -0.5 | -0.1 | -0.6 | -0.4 | -0.9 |
| 25316   | Ms4a2           | -0.5   | -0.1 | -0.6 | -0.6 | -0.5 | -0.3 | -0.3   | -0.3 | -0.1 | 0.0  | -0.3 | -0.4 |
| 25326   | Jak3            | -0.2   | -0.9 | -0.5 | -0.7 | -0.4 | -0.5 | -0.5   | -0.2 | 0.2  | -0.1 | -0.2 | -0.3 |
| 25464   | Icam1           | -0.8   | -0.7 | -1.1 | -0.8 | 0.4  | -0.6 | 0.1    | -0.2 | 0.1  | -0.2 | -0.3 | -0.1 |
| 25544   | Sele            | -1.0   | -1.3 | -0.5 | 0.0  | 0.3  | 0.0  | 0.0    | -0.3 | -0.1 | 0.1  | 0.1  | 0.4  |
| 25599   | Cd74            | -0.6   | -1.0 | -0.8 | -0.3 | -0.1 | -0.7 | -0.5   | -0.1 | 0.5  | 0.0  | -0.4 | 0.0  |
| 29168   | Ubd             | -1.1   | -2.1 | -1.9 | -1.7 | -1.2 | -2.0 | -0.1   | 0.1  | 1.2  | -0.1 | -0.6 | 0.7  |
| 29187   | Cd69            | -1.3   | -1.2 | -1.4 | -1.5 | -0.3 | -1.0 | -0.1   | -0.2 | 1.1  | -0.4 | 0.1  | -0.5 |
| 29260   | Tlr4            | -0.6   | -0.8 | -0.6 | 0.0  | -0.1 | -0.7 | -0.3   | -0.2 | -0.2 | 0.0  | -0.2 | -0.3 |
| 50654   | Ctss            | -0.7   | -1.1 | -0.8 | -0.6 | -0.5 | -0.6 | -0.1   | -0.3 | 0.0  | -0.3 | -0.3 | -0.3 |
| 54289   | Rgs1            | -1.9   | -1.6 | -2.1 | -1.7 | -1.2 | -1.8 | -0.1   | -0.2 | 0.7  | -0.1 | -0.3 | -0.7 |
| 64513   | Pawr            | -0.1   | 0.0  | -0.9 | -0.1 | -0.2 | -0.3 | -0.1   | -0.3 | -0.4 | 0.1  | -0.4 | -0.3 |
| 64569   | Lst1            | -0.7   | -1.1 | -0.5 | -0.6 | 0.1  | -0.6 | -0.5   | -0.5 | 0.3  | -0.7 | -0.3 | -0.3 |
| 79126   | Cfi             | 0.8    | 0.3  | -0.6 | -0.8 | -1.1 | -1.4 | -0.4   | -0.2 | -0.2 | 0.0  | -0.1 | 0.1  |
| 81511   | Lat             | -0.9   | -1.4 | -0.8 | -0.8 | -0.2 | -0.5 | 0.1    | 0.2  | 0.9  | 0.1  | 0.0  | 0.0  |
| 81780   | Ccl5            | -0.4   | -0.6 | -0.4 | -0.5 | -0.2 | -0.4 | -0.8   | -0.7 | 0.0  | -0.7 | -0.6 | -0.5 |
| 85420   | Prkcq           | -0.4   | -0.5 | -0.5 | -0.2 | 0.5  | 0.3  | -0.5   | -0.5 | 0.2  | -0.8 | -0.8 | -0.4 |
| 89804   | Tek             | -0.5   | -0.9 | -0.6 | -0.5 | -0.2 | -0.2 | -0.2   | -0.7 | 0.0  | -0.5 | -0.6 | -0.7 |
| 155151  | Coro1a          | -1.4   | -2.4 | -1.7 | -1.2 | -0.4 | -1.2 | -0.1   | 0.1  | 1.2  | -0.4 | -0.2 | 0.6  |
| 155918  | Lcp2            | -0.3   | -0.2 | -0.3 | -0.6 | -0.1 | -0.4 | 0.0    | 0.0  | 0.6  | -0.2 | 0.2  | 0.1  |
| 156767  | Tnfrsf1b        | 0.1    | -0.6 | 0.2  | -0.1 | 0.5  | 0.1  | -0.3   | -0.4 | 0.2  | -0.3 | -0.2 | -0.1 |
| 171108  | P2ry14          | -0.6   | -0.8 | -0.9 | -0.9 | -0.4 | -0.4 | -0.1   | 0.0  | 0.1  | 0.1  | -0.3 | -0.4 |
| 192262  | C1s             | -0.5   | -0.6 | -0.8 | -0.4 | 0.0  | -0.4 | -0.7   | -0.4 | 0.0  | -0.4 | -0.4 | -0.5 |
| 286918  | Mx2             | -0.5   | -0.3 | -0.6 | -0.4 | 0.2  | -0.4 | -0.1   | 0.0  | -0.4 | -0.2 | -0.2 | 0.2  |
| 286975  | Scap1           | -1.1   | -1.3 | -1.1 | -1.2 | -0.5 | -0.8 | 0.1    | 0.0  | 1.0  | -0.2 | -0.1 | 0.1  |
| 287561  | Ccl7            | -0.4   | -1.0 | -0.5 | -0.9 | 0.4  | -0.3 | -0.4   | -0.5 | -0.1 | -0.8 | -0.3 | -0.2 |
| 287910  | Ccl6            | -0.6   | -1.2 | -1.2 | -0.4 | 0.0  | -0.5 | 0.3    | 0.2  | 0.8  | 0.2  | 0.3  | 0.3  |
| 291359  | Ly86_predicted  | -0.6   | -0.8 | -1.0 | -0.5 | -0.3 | -0.8 | -0.6   | -0.5 | 0.3  | -0.4 | -0.3 | -0.3 |
| 294269  | RT1-Da          | -0.7   | -0.8 | -1.0 | -0.1 | -0.2 | -0.5 | -0.4   | -0.4 | 0.0  | -0.2 | -0.4 | -0.1 |
| 295703  | Serping1        | -0.7   | -1.6 | -1.2 | -0.5 | -0.2 | -0.4 | -0.8   | -0.5 | 0.2  | -0.5 | -0.7 | -0.2 |
| 296257  | Cst7_predicted  | -0.7   | -0.8 | -0.6 | -0.7 | 0.0  | 0.0  | -0.1   | -0.2 | 0.5  | -0.4 | -0.2 | 0.1  |
| 300678  | Cd3g            | -2.6   | -3.4 | -2.2 | -2.4 | -0.9 | -2.1 | -0.7   | -0.5 | 0.8  | -0.8 | -0.7 | -0.4 |
| 305341  | Rhoh            | -1.6   | -2.0 | -1.7 | -1.8 | -0.8 | -1.3 | -0.9   | -0.9 | 0.3  | -0.5 | -0.5 | -0.7 |
| 309217  | Ms4a1_predicted | -0.6   | -1.3 | -0.8 | -0.7 | 0.5  | -0.6 | 0.2    | 0.0  | 1.4  | -0.2 | 0.3  | -0.1 |
| 309452  | Nfkb2           | -0.1   | -1.0 | -0.3 | -0.5 | 0.1  | -0.3 | -0.2   | -0.1 | 0.1  | -0.1 | -0.3 | -0.1 |
| 361795  | Ltb             | -1.1   | -1.5 | -1.1 | -1.1 | -0.4 | -0.8 | -0.1   | -0.2 | 0.7  | -0.2 | -0.1 | 0.0  |
| 362456  | Arhgdib         | -0.5   | -0.6 | -0.7 | -0.3 | 0.0  | -0.3 | 0.3    | 0.0  | 0.7  | 0.0  | -0.1 | -0.4 |
| 366518  | Tnfrsf14        | -1.6   | -1.9 | -1.6 | -1.4 | -0.3 | -1.2 | 0.2    | -0.1 | 0.6  | -0.4 | -0.1 | 0.0  |
| 406163  | Gpsm3           | -0.3   | -0.8 | -0.1 | -0.6 | -0.2 | -0.6 | 0.2    | 0.6  | 0.9  | 0.4  | 0.6  | 0.3  |
| 444986  | Il22ra2         | -2.1   | -2.0 | -1.5 | -1.2 | -0.3 | -1.1 | -1.0   | -1.4 | -0.1 | -1.4 | -1.4 | -1.5 |
| 474143  | Clecsf6         | -0.6   | -0.9 | -0.6 | 0.0  | -0.3 | -0.4 | -0.2   | -0.5 | -0.4 | -0.3 | -0.8 | -0.6 |
| 498335  | LOC498335       | -1.0   | -2.4 | -2.2 | -1.5 | -0.2 | 0.0  | -0.5   | -0.4 | 1.3  | -0.8 | -0.2 | 0.3  |
| 499356  | Blnk            | -0.4   | -0.8 | -0.7 | -0.6 | -0.4 | -0.6 | -0.2   | -0.4 | 0.1  | 0.1  | -0.1 | 0.0  |



**Table S5:** Differences in average log<sub>2</sub> expression levels between different fatty acid diets and corresponding reference AIN-93G diet for sterol metabolism-related genes in the “steroid” cluster.

| Gene ID | Symbol  | Day 21 |     |     |     |     |     | Day 50 |      |      |     |      |      |
|---------|---------|--------|-----|-----|-----|-----|-----|--------|------|------|-----|------|------|
|         |         | HFB    | HFO | HFS | LFB | LFO | LFS | HFB    | HFO  | HFS  | LFB | LFO  | LFS  |
| 25675   | Hmgcr   | 0.6    | 1.1 | 0.2 | 0.7 | 0.4 | 0.7 | 0.1    | -0.1 | -0.4 | 0.2 | 0.1  | -0.4 |
| 29540   | Hsd17b7 | 0.7    | 1.7 | 1.0 | 0.6 | 0.4 | 1.0 | -0.1   | -0.2 | -0.8 | 0.1 | -0.2 | -0.3 |
| 64191   | Dhcr7   | 1.1    | 1.0 | 1.0 | 0.7 | 0.4 | 0.5 | -0.3   | -0.1 | -0.3 | 0.0 | -0.2 | 0.0  |
| 89784   | Idi1    | 0.8    | 1.4 | 0.6 | 1.9 | 0.7 | 1.1 | -0.2   | -0.6 | -0.6 | 0.6 | -0.4 | -0.3 |
| 298298  | Dhcr24  | 0.9    | 1.7 | 1.0 | 2.4 | 1.1 | 1.8 | -0.1   | -0.4 | -0.9 | 0.4 | -0.2 | -0.7 |
| 29230   | Sqle    | 0.9    | 2.0 | 0.9 | 1.2 | 0.5 | 0.7 | 0.0    | -0.2 | -0.7 | 0.3 | -0.3 | -0.6 |

**Figure S4:** Expression profiles of 69 human homologs of genes up-regulated by fatty acid diets in the Miller et al breast cancer datasets. Expression levels were centered and averaged over all samples within the same quartile of the tumor sizes. The yellow color in the yellow-blue bar on the left hand side indicated the statistically significant difference between the expression levels in largest (Quartile 4) and smallest (Quartile 1) tumors.

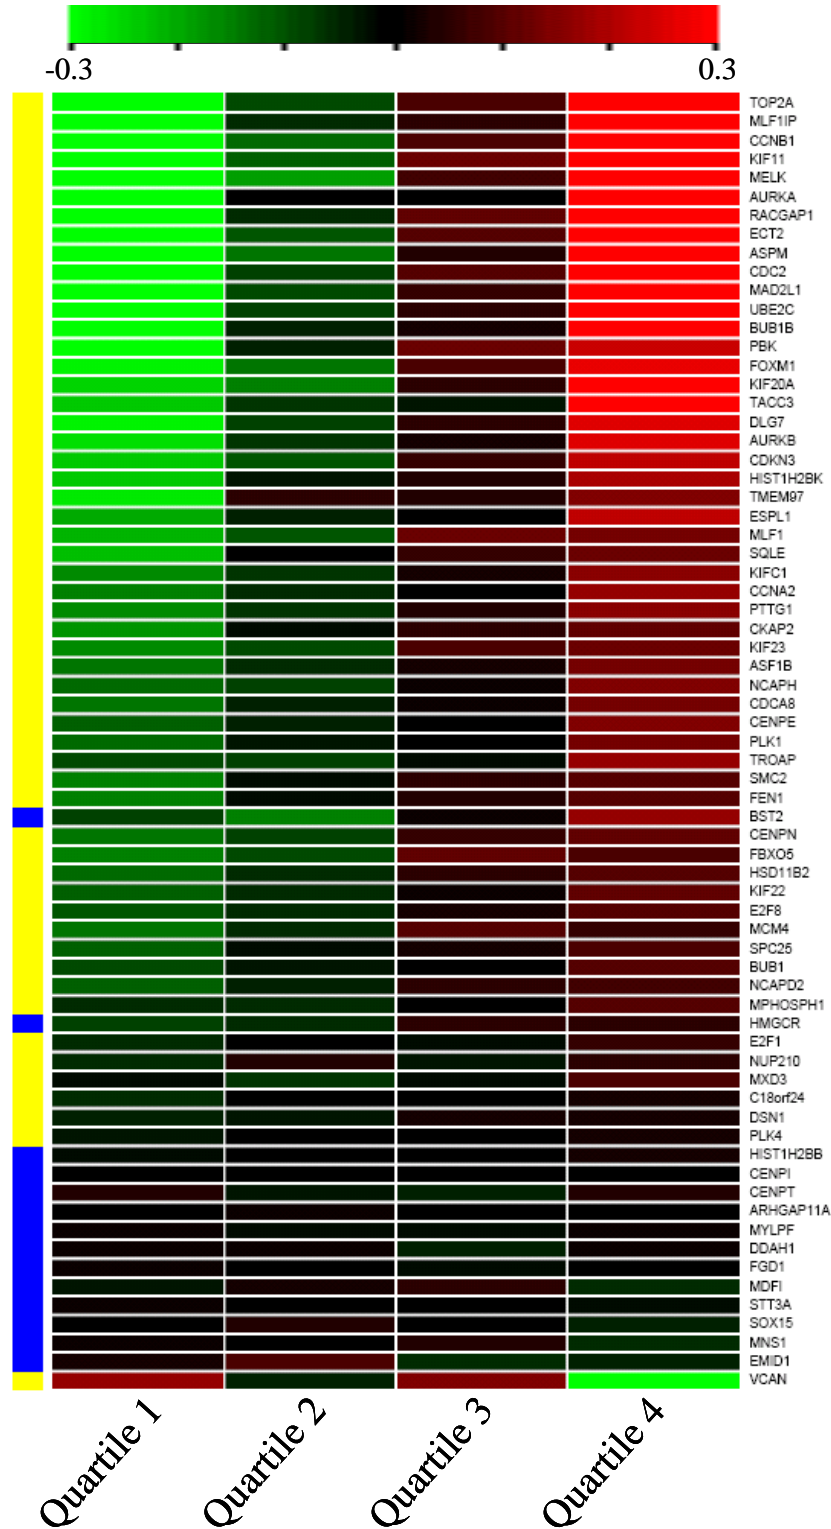

**Figure S5:** Expression profiles of 15 human homologs of genes down-regulated by fatty acid diets in the Miller et al breast cancer datasets. Expression levels were centered and averaged over all samples within the same quartile of the tumor sizes. The yellow color in the yellow-blue bar on the left hand side indicated the statistically significant difference between the expression levels in largest (Quartile 4) and smallest (Quartile 1) tumors.

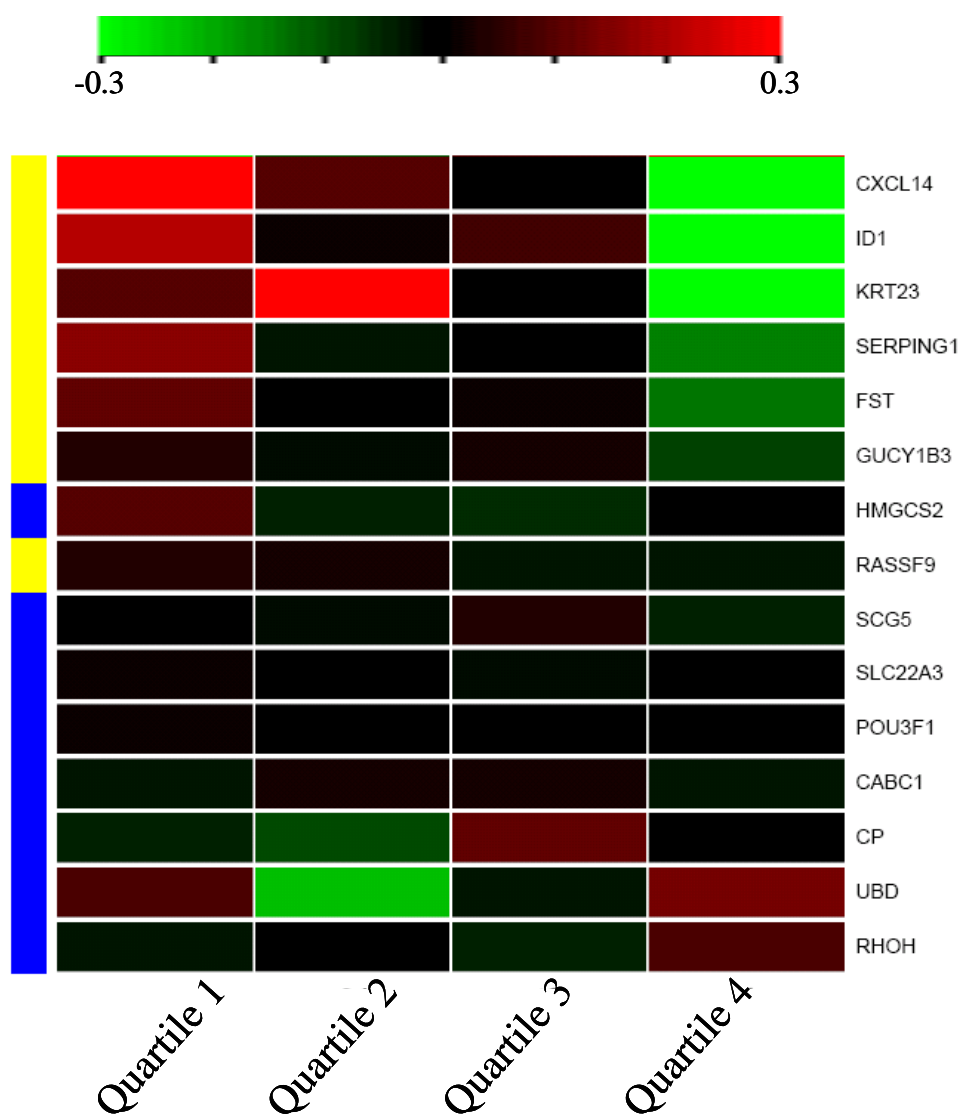

Supplement: 00007.2009_1.pdf [file 00007.2009_1.pdf]
